# Supplementary material
Source: ML conference proceedings conference paper supplement (https://openreview.net/forum?id=fogJgrozu1)

ARC

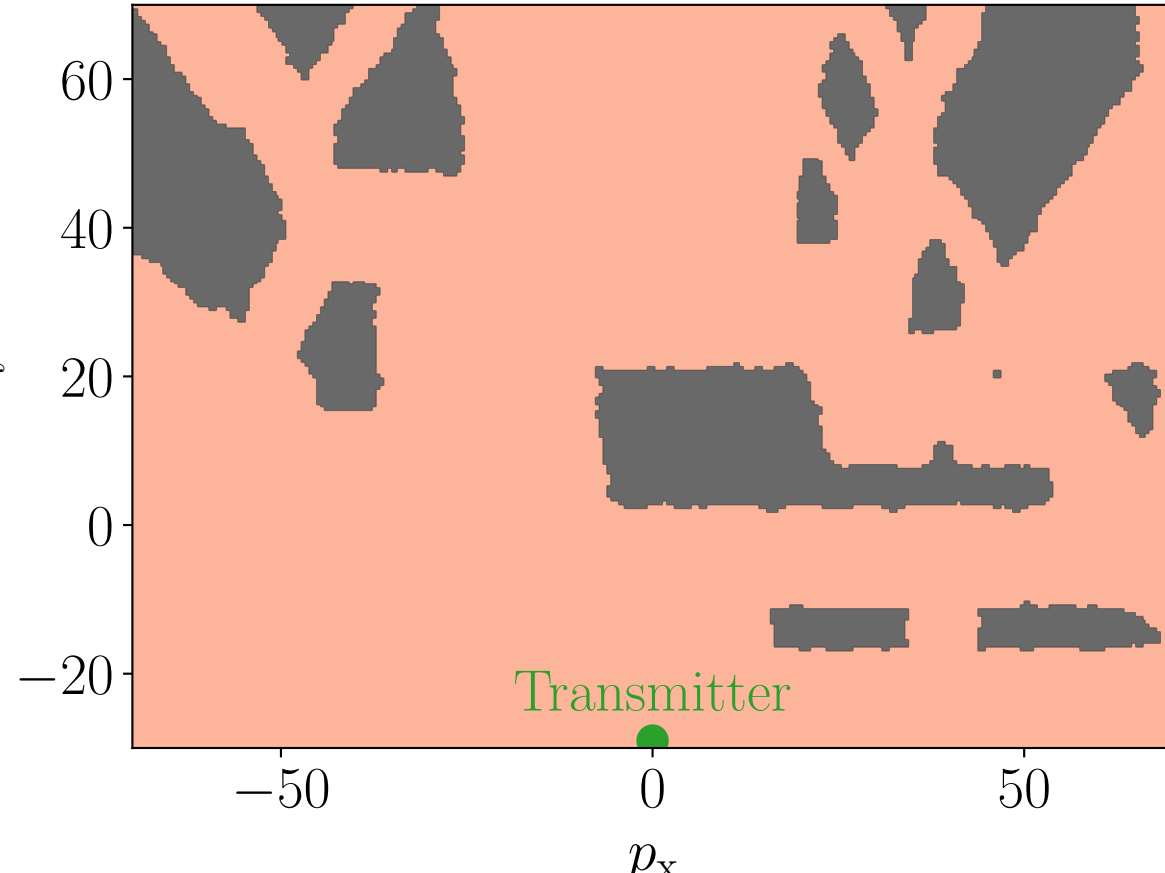

Mondrian ARC

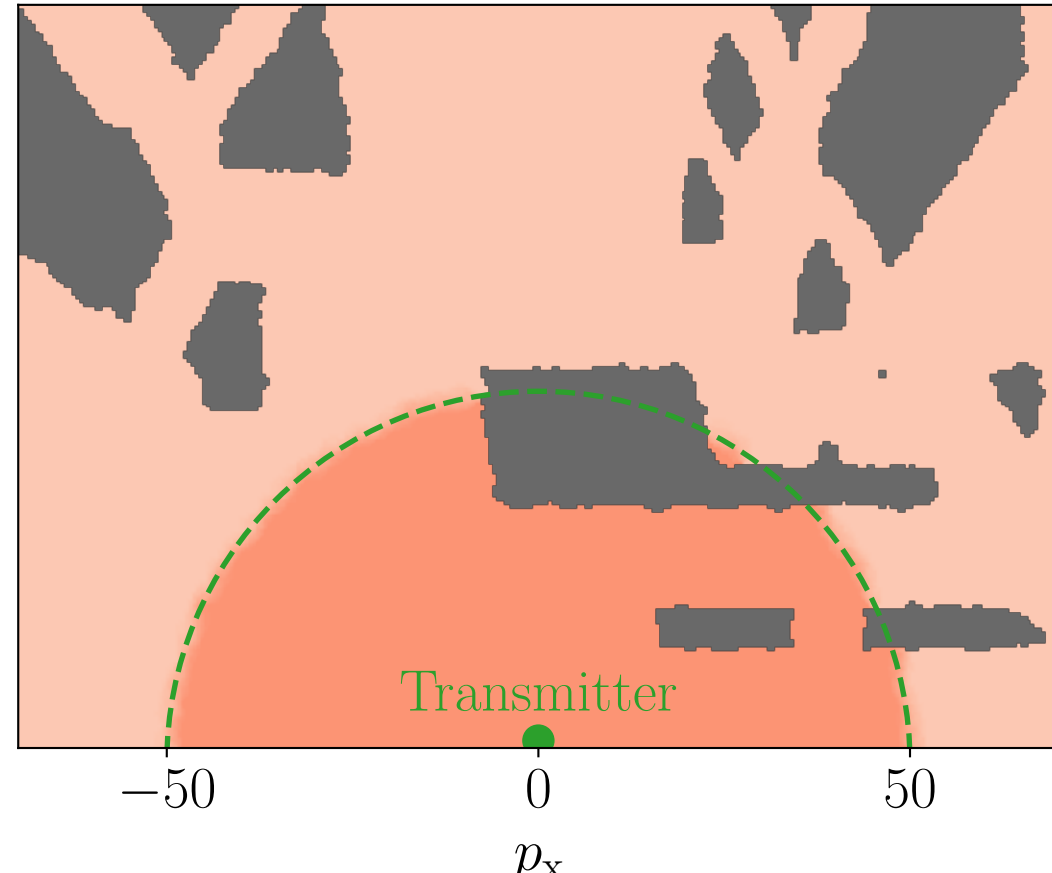

L-ARC

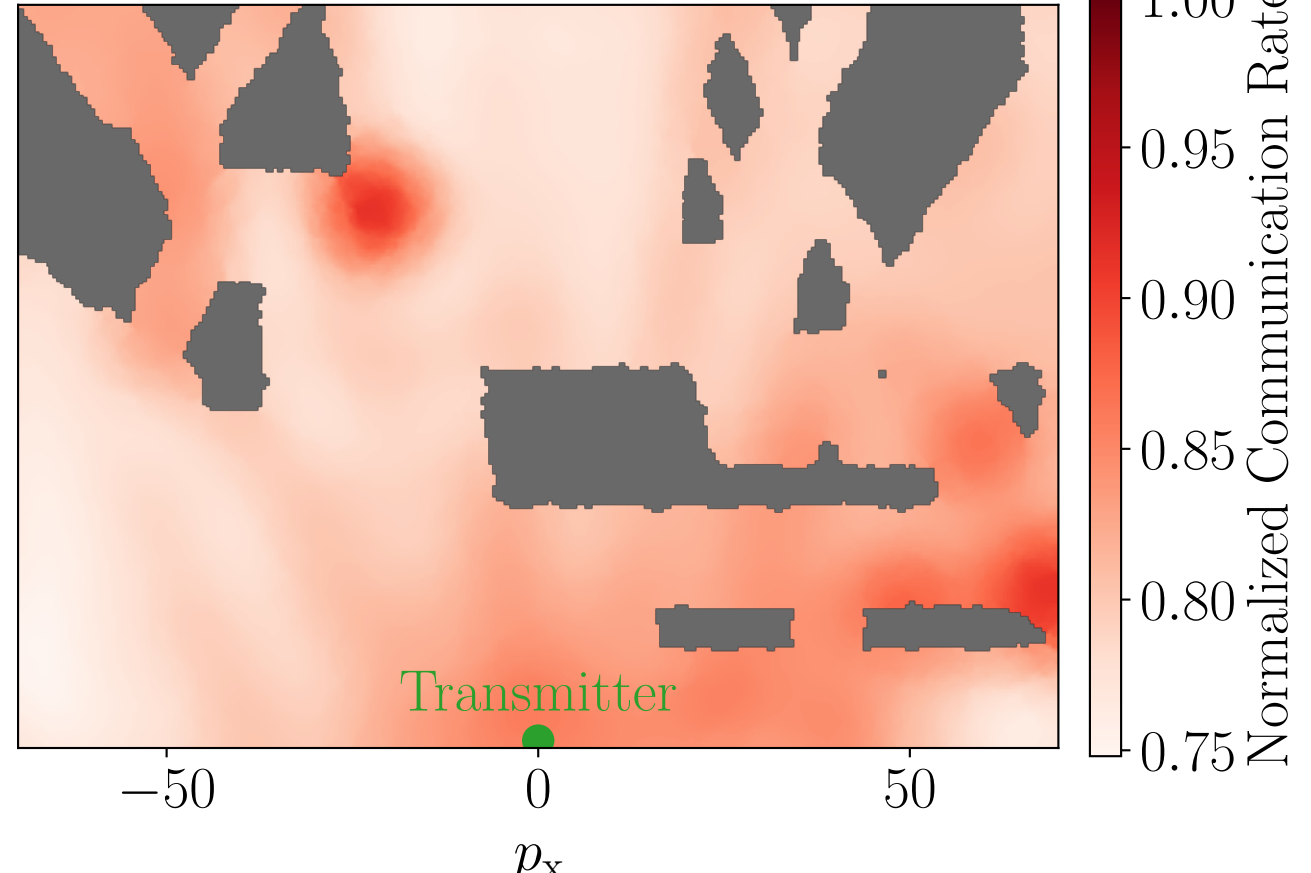

Supplement: supplementary_material [file attachment]

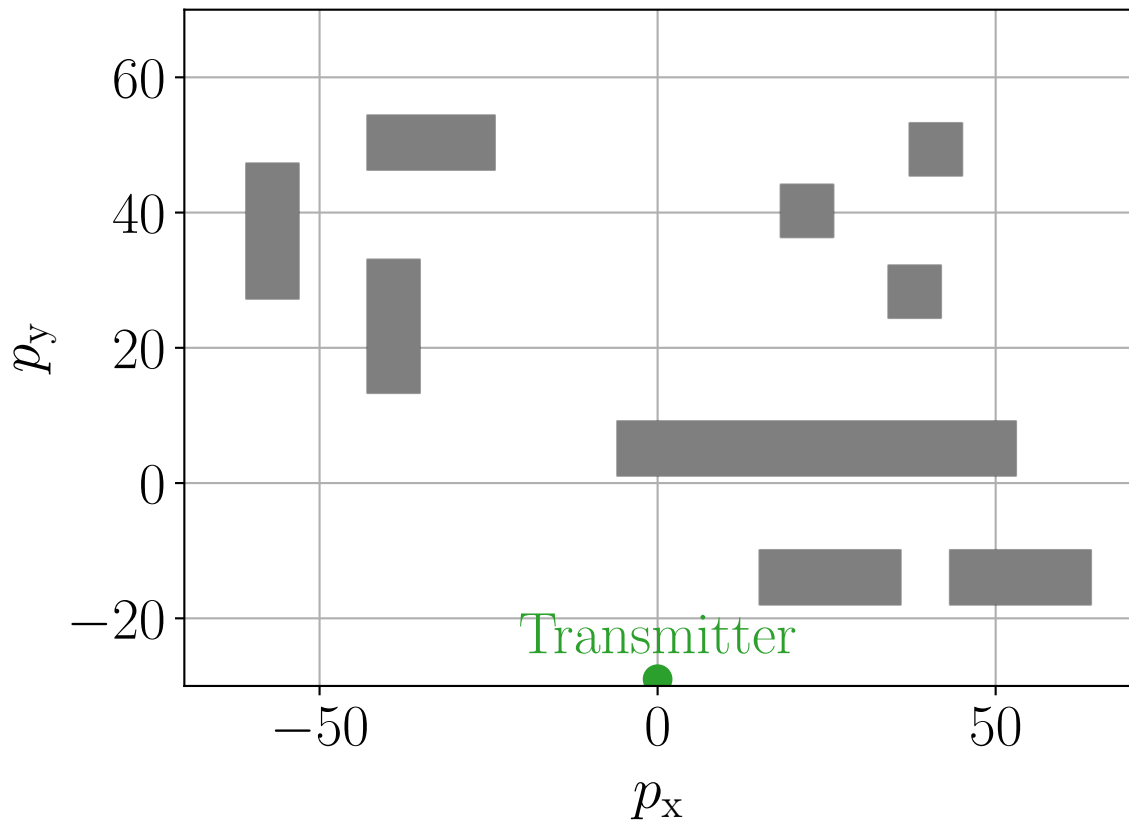

Supplement: supplementary_material [file attachment]

L-ARC  $l = 50$ 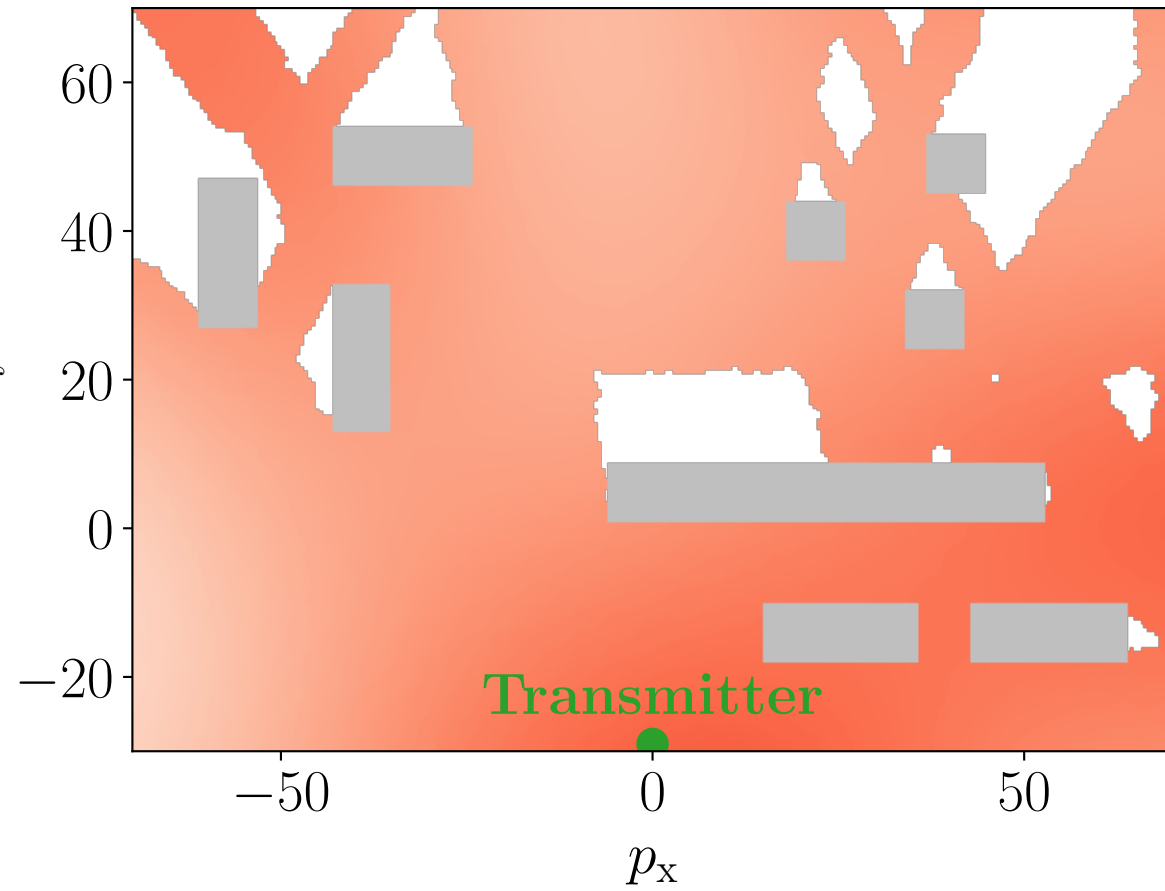L-ARC  $l = 25$ 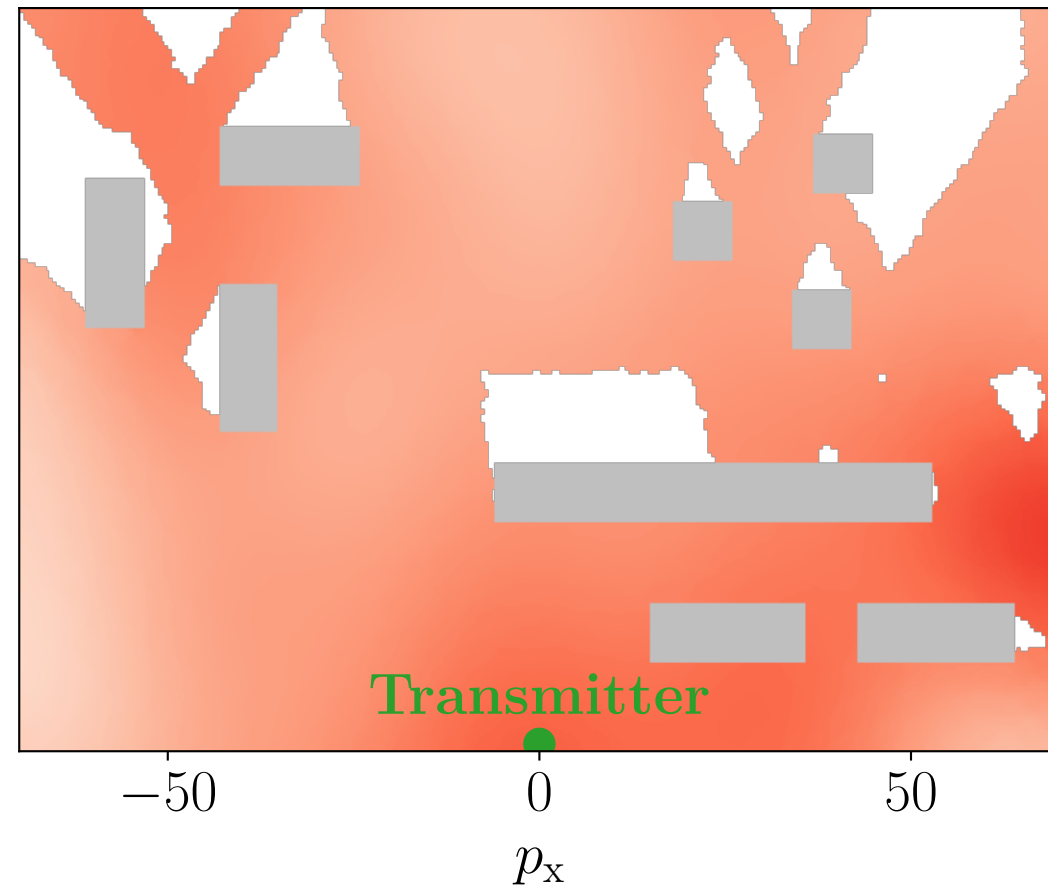L-ARC  $l = 10$ 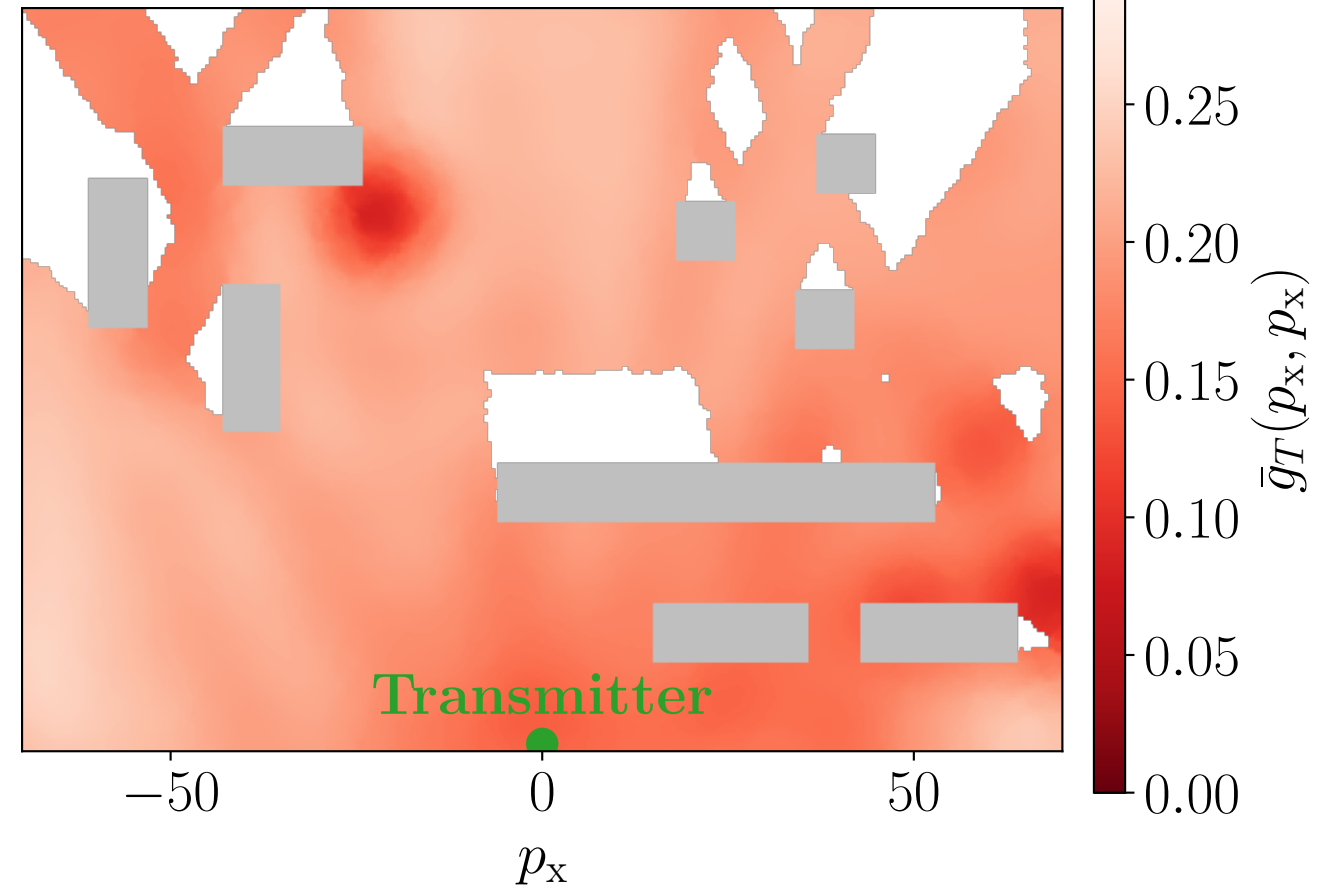

Supplement: supplementary_material [file attachment]

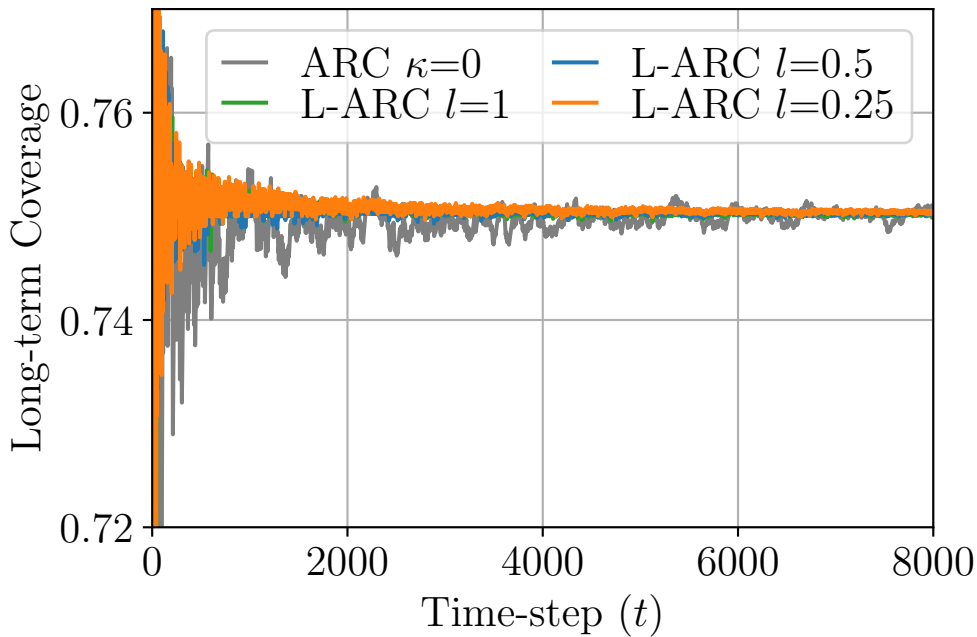

Supplement: supplementary_material [file attachment]

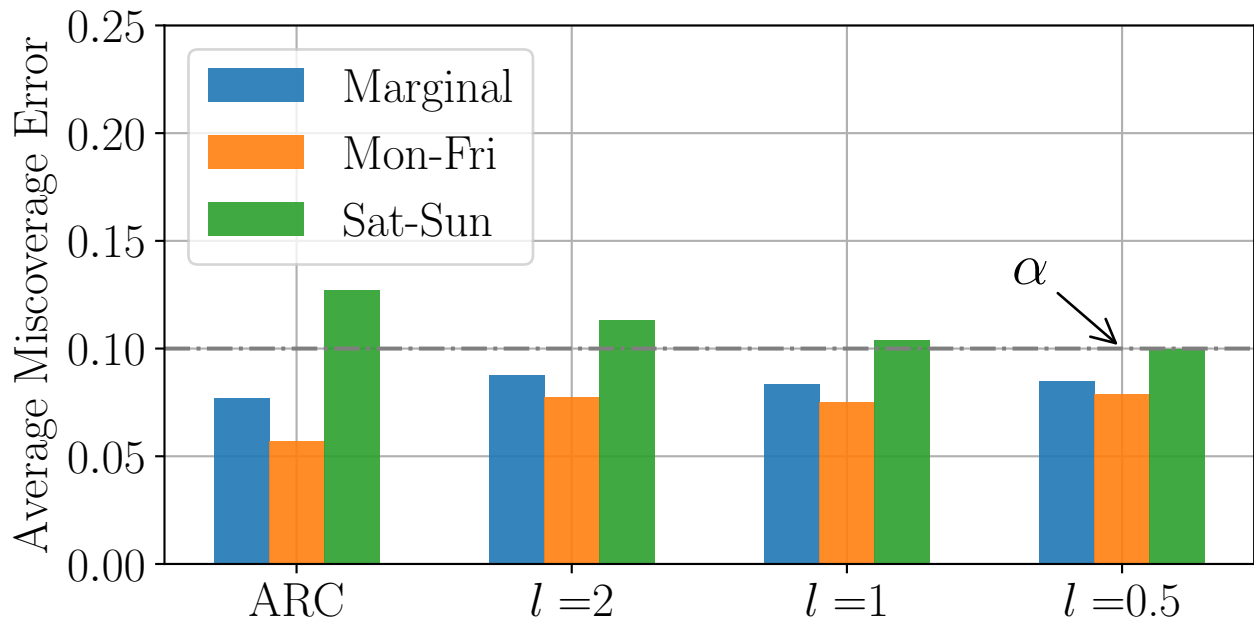

Supplement: supplementary_material [file attachment]

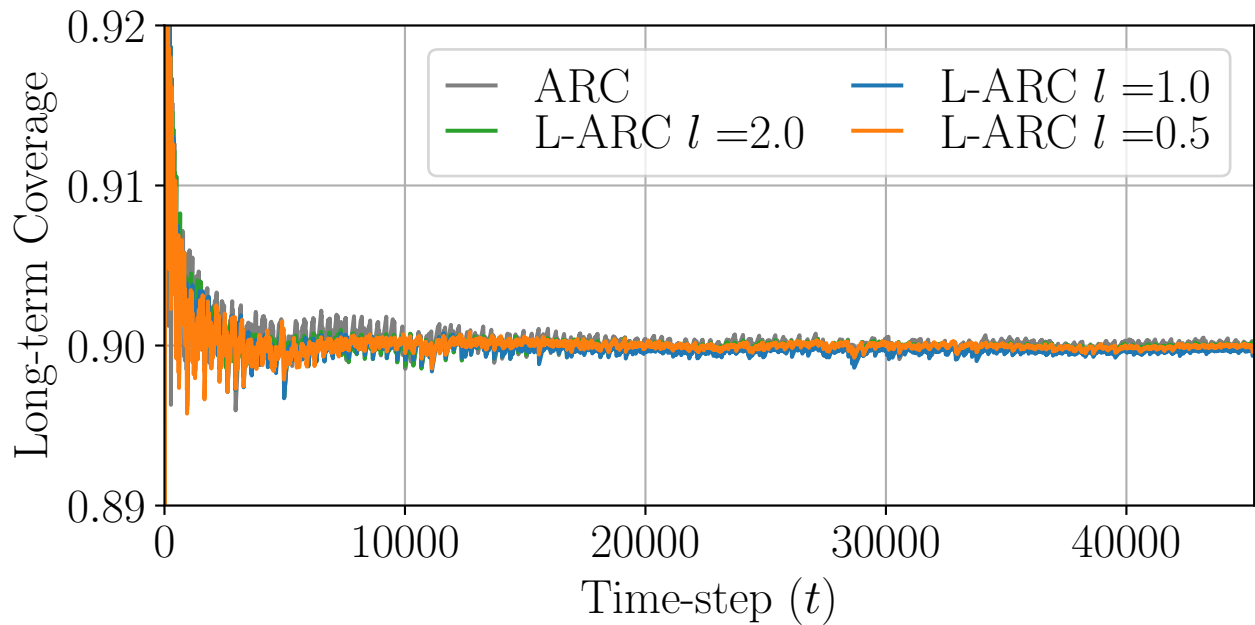

Supplement: supplementary_material [file attachment]

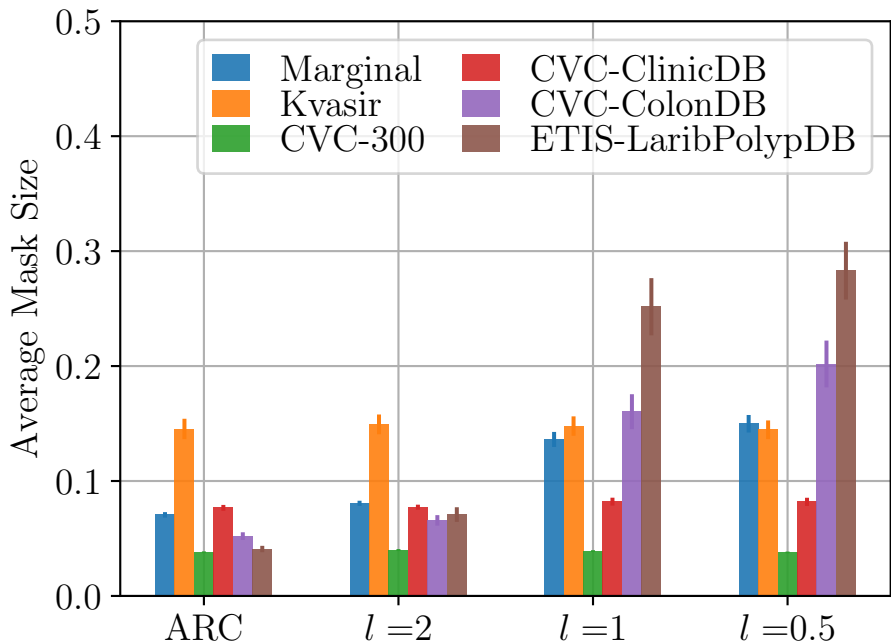

Supplement: supplementary_material [file attachment]

ARC

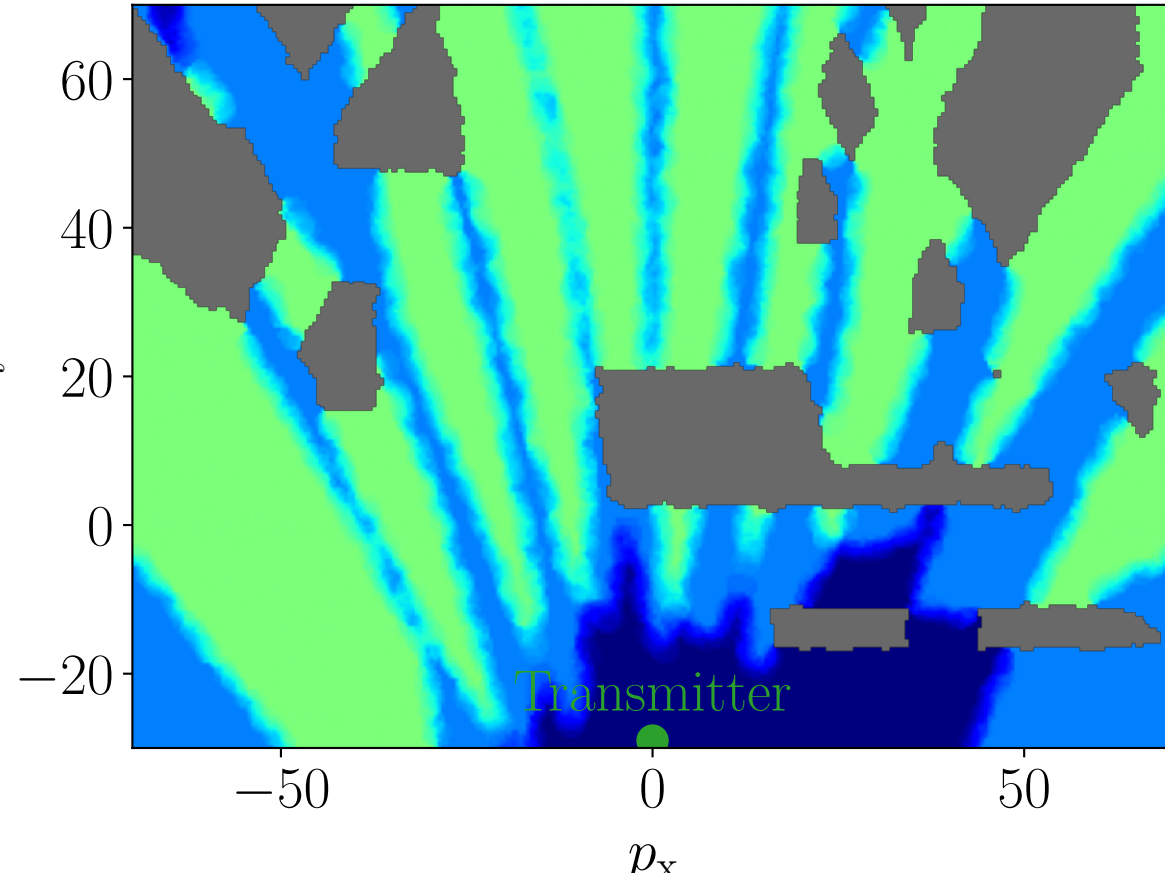

Mondrian ARC

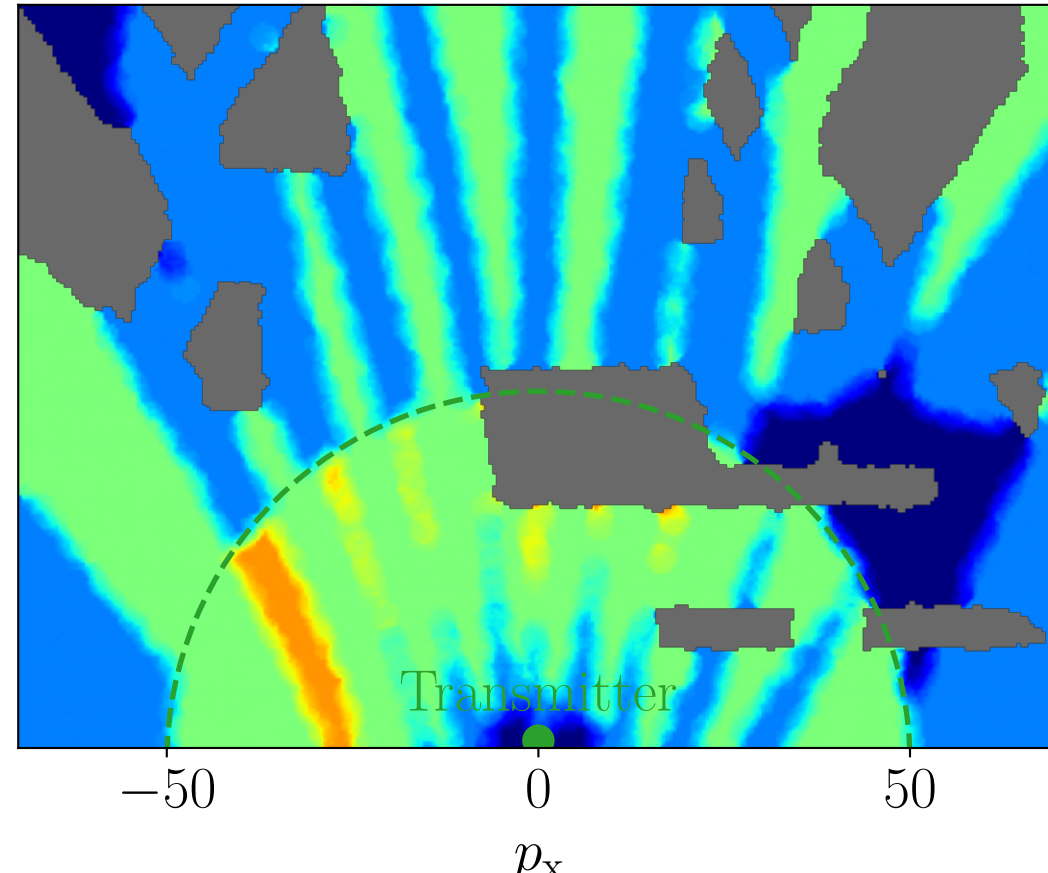

L-ARC

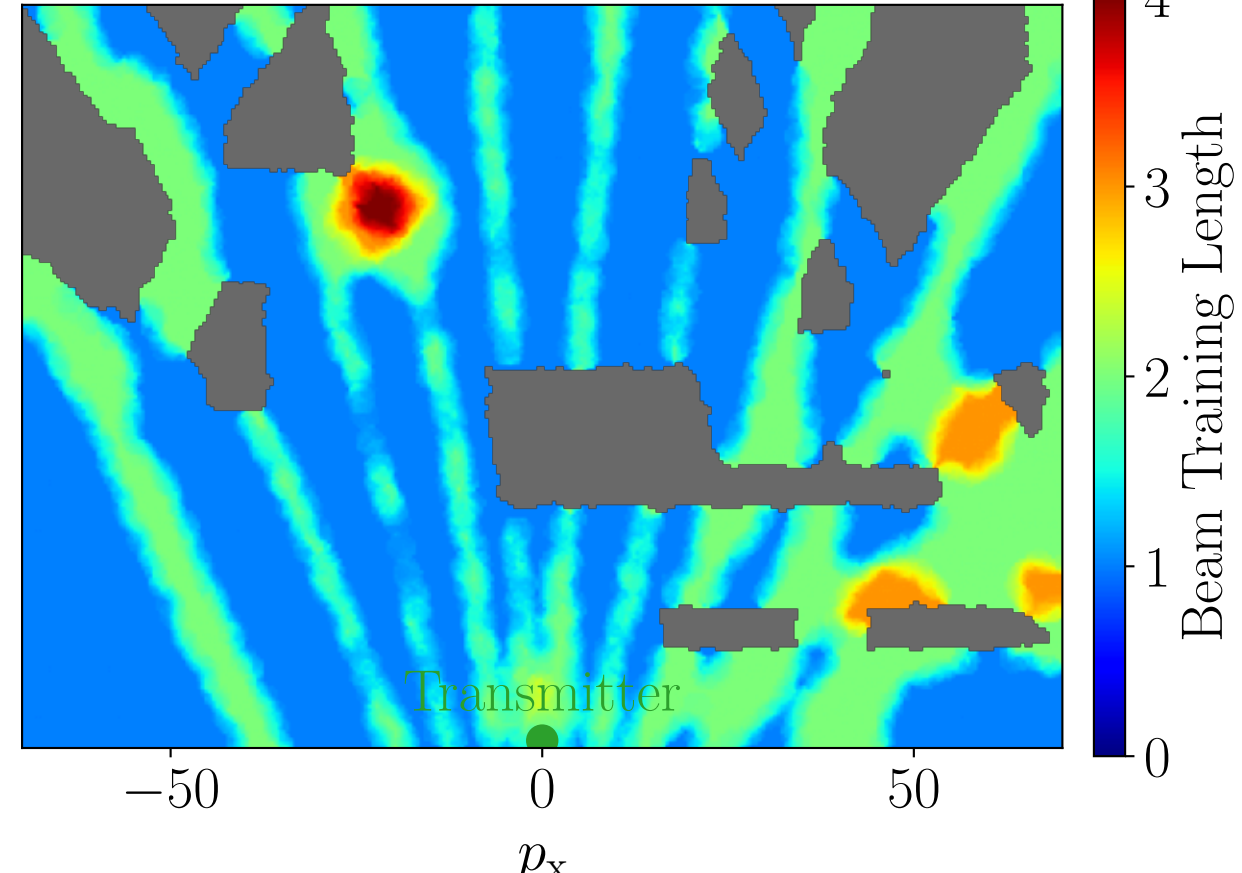

Supplement: supplementary_material [file attachment]

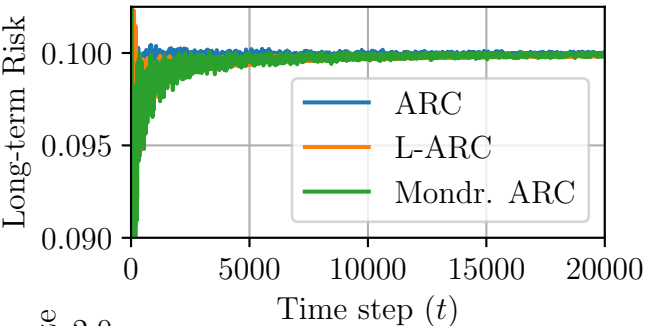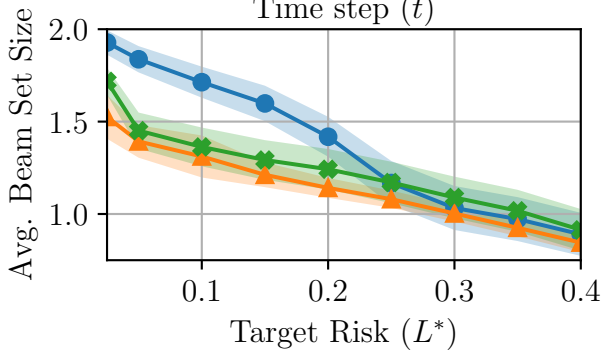

Supplement: supplementary_material [file attachment]

ARC

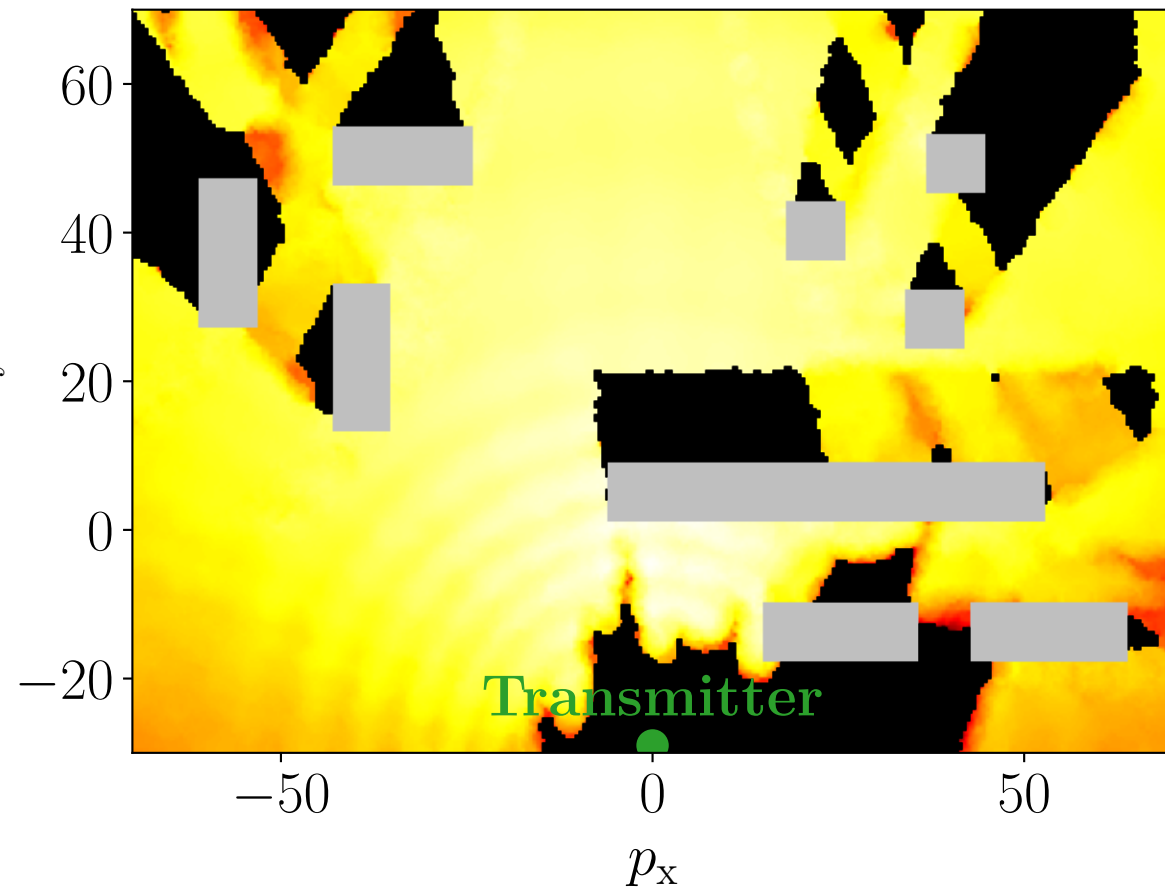

Mondrian ARC

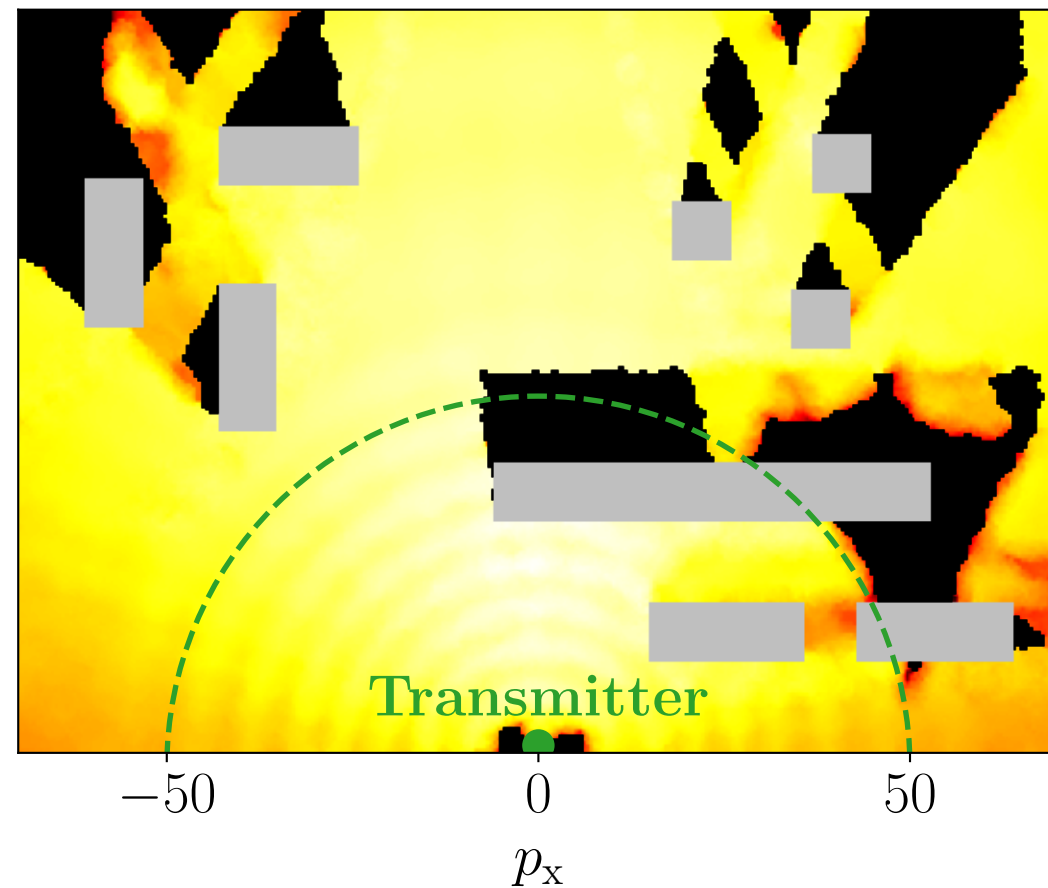

L-ARC

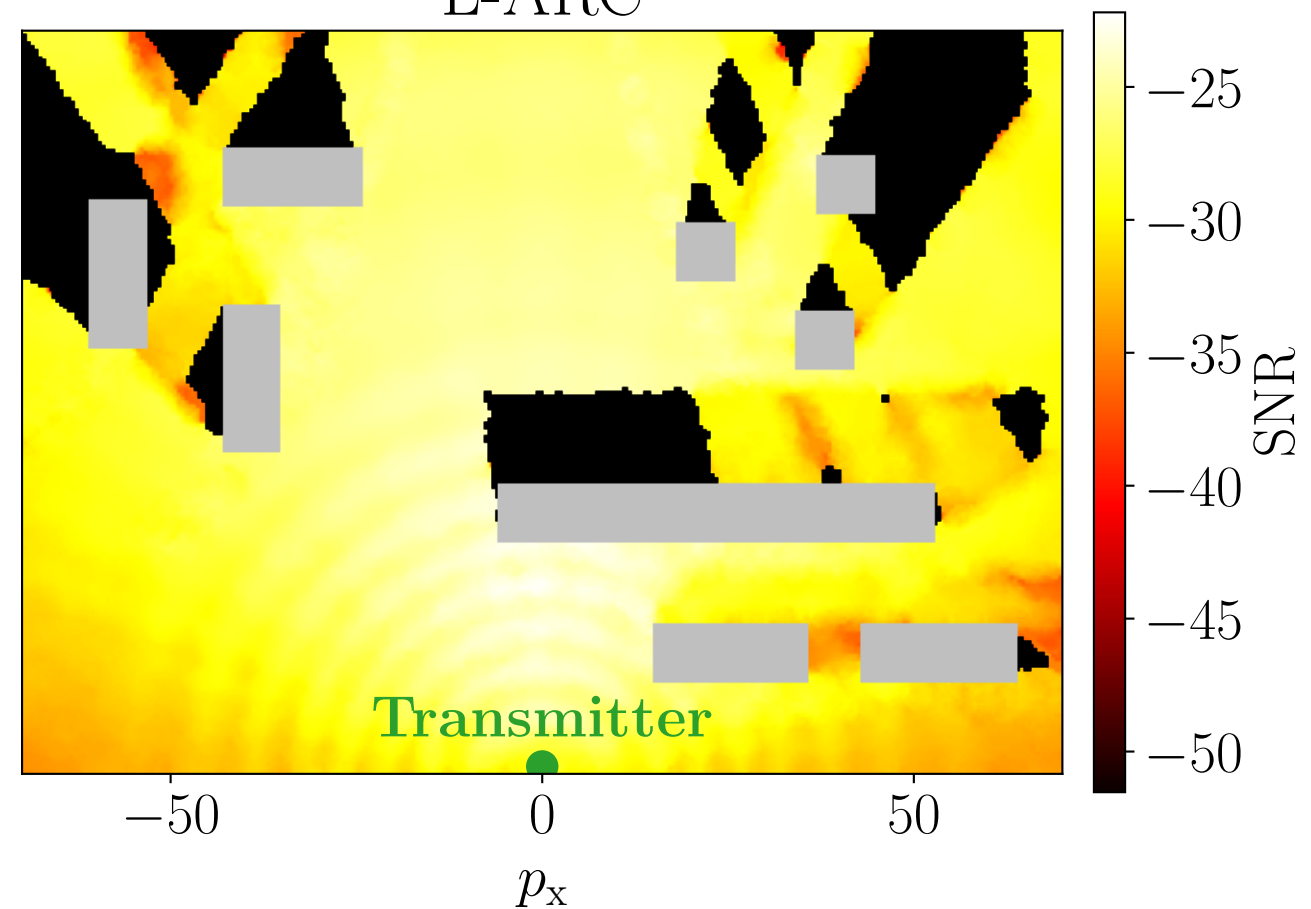

Supplement: supplementary_material [file attachment]

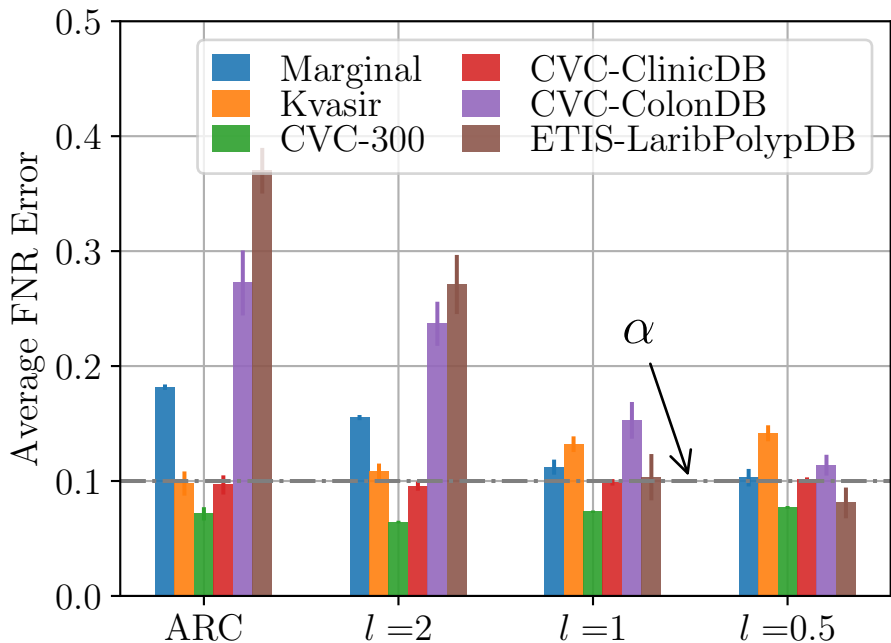

Supplement: supplementary_material [file attachment]

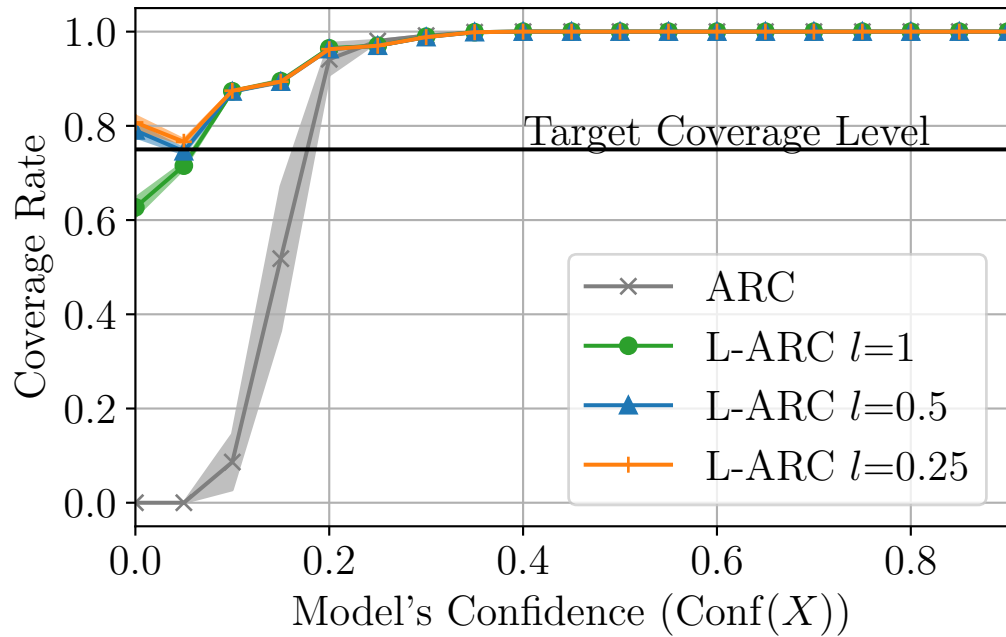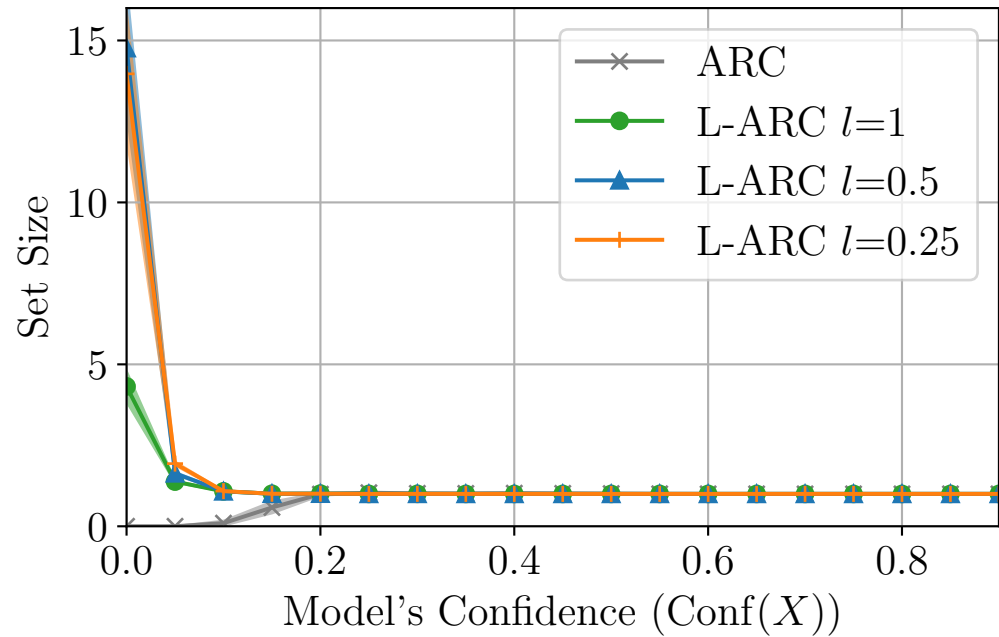

Supplement: supplementary_material [file attachment]

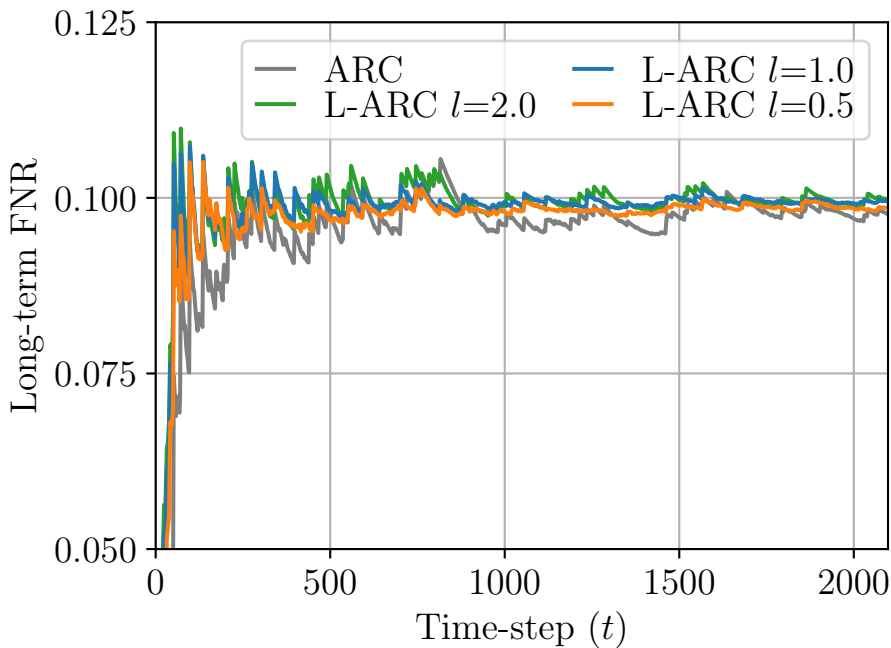

Supplement: supplementary_material [file attachment]
